# Supplementary material
Source: HighWire-hosted journal article supplement (doi:10.1101/rna.075341.120)
Supplement: Supplemental_Table_S7.docx [file Supplemental_Table_S7.docx]

| RMSD values for predictions | | | | | | | | | | | |
| --- | --- | --- | --- | --- | --- | --- | --- | --- | --- | --- | --- |
| PZ9 | before | 9.25 | 9.36 | 9.71 | 9.88 | 10.12 | 10.14 | 10.25 | 11.47 | 11.64 | 12.56 |
| after | 6.81 | 6.79 | 7.02 | 7.08 | 7.90 | 7.97 | 8.35 | 8.65 | 8.93 | 9.62 |
| PZ17 | before | 15.50 | 15.61 | 15.94 | 16.28 | 16.29 | 16.93 | 17.03 | 17.55 | 17.72 | 18.32 |
| after | 9.22 | 9.49 | 10.49 | 11.16 | 13.07 | 17.56 | 18.17 | 19.64 | 19.84 | 19.87 |
| PZ19 | before | 17.02 | 18.27 | 19.50 | 19.16 | 21.48 |  |  |  |  |  |
| after | 14.24 | 14.91 | 15.02 | 15.71 | 15.91 |  |  |  |  |  |
| PZ20 | | 7.03 | 7.88 | 10.25 | 10.61 | 17.00 |  |  |  |  |  |
| PZ21 | | 5.38 | 5.79 | 6.16 | 6.72 | 8.10 |  |  |  |  |  |

## Table S7. RMSD values before and after reconstruction for PZ9, PZ17, PZ19 (from low to high), and RMSD values for PZ20 and PZ21.
